# Supplementary material for: Direct and efficient cellular transformation of primary rat mesenchymal precursor cells by KSHV
Source: JCI journal article supplement (doi:10.1172/jci58530), 2012-02-01

1 **Supplemental Information for**

2

3 **Direct Efficient Cellular Transformation of Primary Rat Mesenchymal**

4 **Precursor Cells by KSHV**

5

6 Tiffany Jones, Fengchun Ye, Roble Bedolla, Yufei Huang, Jia Meng, Hongyi Pan,

7 Li-Wu Qian, Fuchun Zhou, Rosalie Moody, Brent Wagner, Mazen Arar, Shou-

8 Jiang Gao

9

10 **This file includes:**

11 Supplemental Figures 1 to 9

12

1 **Supplemental Figure 1.** Genome copy numbers per cell in different passages of  
2 KMM cultures.

3

4 **Supplemental Figure 2.** Expression of LANA and ORF65 proteins in uninduced  
5 MM cells and MM cells induced with TPA for 48 h. **(A)** LANA. Scale bar: 10  $\mu$ m.

6 **(B)** ORF65. Scale bar: 50  $\mu$ m. None of the MM cells expressed LANA and  
7 ORF65 proteins.

8

9 **Supplemental Figure 3.** Expression of KSHV transcripts in uninduced and TPA-  
10 induced KMM cells.

11

12 **Supplemental Figure 4.** Expression of cell surface markers in MM and KMM  
13 cells. MM and KMM cells were examined for the expression of vascular  
14 endothelial markers ( $\beta$ -catenin, VCAM-1, ICAM-1, VWF and VEGFR-1), and  
15 lymphatic endothelial markers (LYVE-1 and podoplanin). Scale bars: 50  $\mu$ m.

16

17 **Supplemental Figure 5.** Regulation of cell growth and cell cycle of MM cells by  
18 KSHV. **(A)** KMM cells had shorter doubling time than MM cells indicated by faster  
19 CFSE dilution. Cells seeded at  $2.5 \times 10^5$  cells per T-25 flask were analyzed daily.  
20 **(B-C)** KSHV infection accelerated cell cycle progression. KMM cultures have  
21 more cells in S phase and less cells in G0G1 phase **(B)**, and faster transition  
22 from G0G1 to S phase shown by more BrdU incorporation **(C)** than MM cells.  
23 Cells seeded at  $2.5 \times 10^5$  cells per T-25 flask were analyzed at day 1 post-seeding.

1 (D) KMM cells resisted cell cycle arrest in serum-free media. MM cells arrested in  
2 G0G1 phase at day 1 post-seeding in serum-free media while KMM cells resisted  
3 arrest with 20% remaining in S phase for up to day 4 post-seeding. Cell cycle  
4 was analyzed at day 2 post-seeding. (E) KMM cells incorporated BrdU at a faster  
5 rate than MM cells in serum-free media as shown at day 2 post-seeding. (F)  
6 KMM cells had higher saturation density than MM cells. Cells seeded at  $2 \times 10^5$   
7 cells/well in 6-well plates and cultured with daily media change for 2 weeks were  
8 counted for total numbers of cells per well.

9

10 **Supplemental Figure 6.** Infection and cellular transformation of MM cells by  
11 KSHV derived from BCP-1 cells. (A) Morphology of uninfected cells (MM) and  
12 KSHV-infected cells (KMM) at day 1 and 3 post-seeding with the initial seeding at  
13  $5 \times 10^4$  cells/well in 6 well plates. KMM cells grew substantially faster than MM  
14 cells. Scale bar: 50  $\mu\text{m}$ . (B) Detection of KSHV latent protein LANA in KMM cells  
15 but not in MM cells. Scale bar: 20  $\mu\text{m}$ . (C) KMM cells formed large colonies while  
16 MM cells did not form any colony in semisolid softagar media. Scale bar: 200  $\mu\text{m}$ .

17

18 **Supplemental Figure 7.** Immunohistochemical staining of KMM tumors for H&E,  
19 vascular endothelial markers (VE-cadherin, ICAM-1 and VCAM-1), and lymphatic  
20 endothelial markers (podoplanin and PROX-1). Representative slit-like spaces  
21 were labeled with arrowheads while microvessels were labeled with arrows.  
22 Scale bars were 20  $\mu\text{m}$  for all panels except for the H&E panel, which was 80  $\mu\text{m}$ .

23

1 **Supplemental Figure 8.** Immunohistochemical staining of human KS tumors for  
2 H&E, Ki67, LANA, CD8, CD20, vascular endothelial markers (VE-cadherin, CD31,  
3 and VCAM-1), lymphatic endothelial markers (PROX-1, and VEGFR-3), and  
4 mesenchymal marker vimentin. Representative microvessels were labeled with  
5 arrows. Scale bar: 40  $\mu$ m.

6

7 **Supplemental Figure 9.** Expression of KSHV genes in KMM tumors. Uninduced  
8 (U) and TPA-induced (I) KMM cells were used as controls with expression levels  
9 in uninduced KMM cells set as "1".

# Supplemental Figure 1

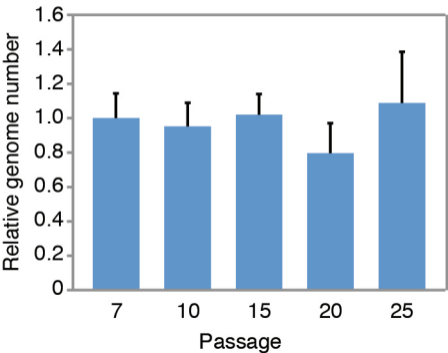

# Supplemental Figure 2

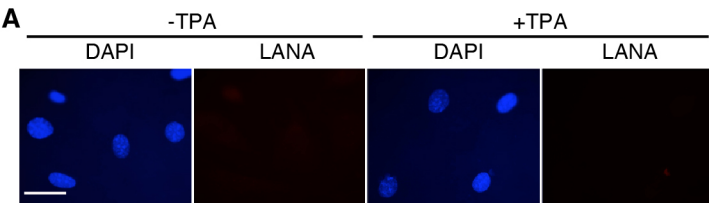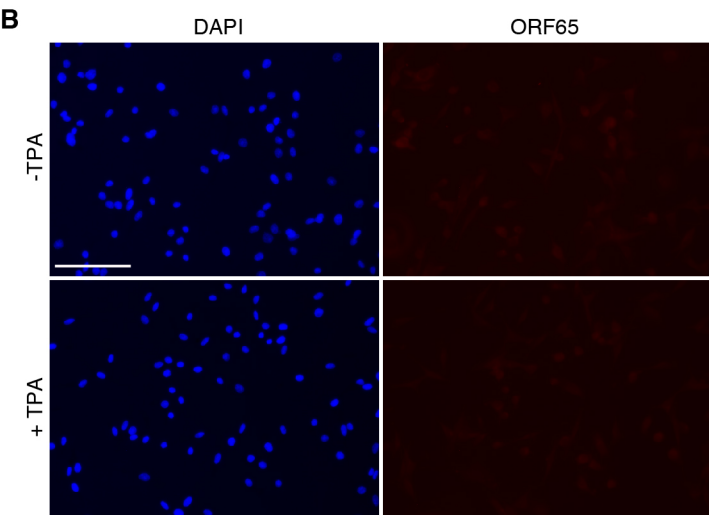

# Supplemental Figure 3

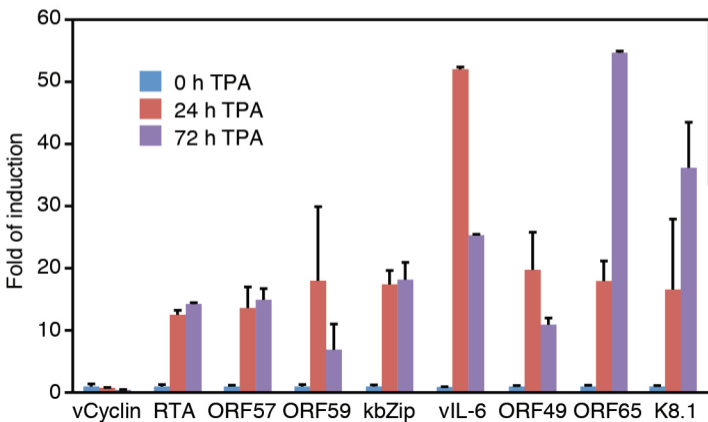

# Supplemental Figure 4

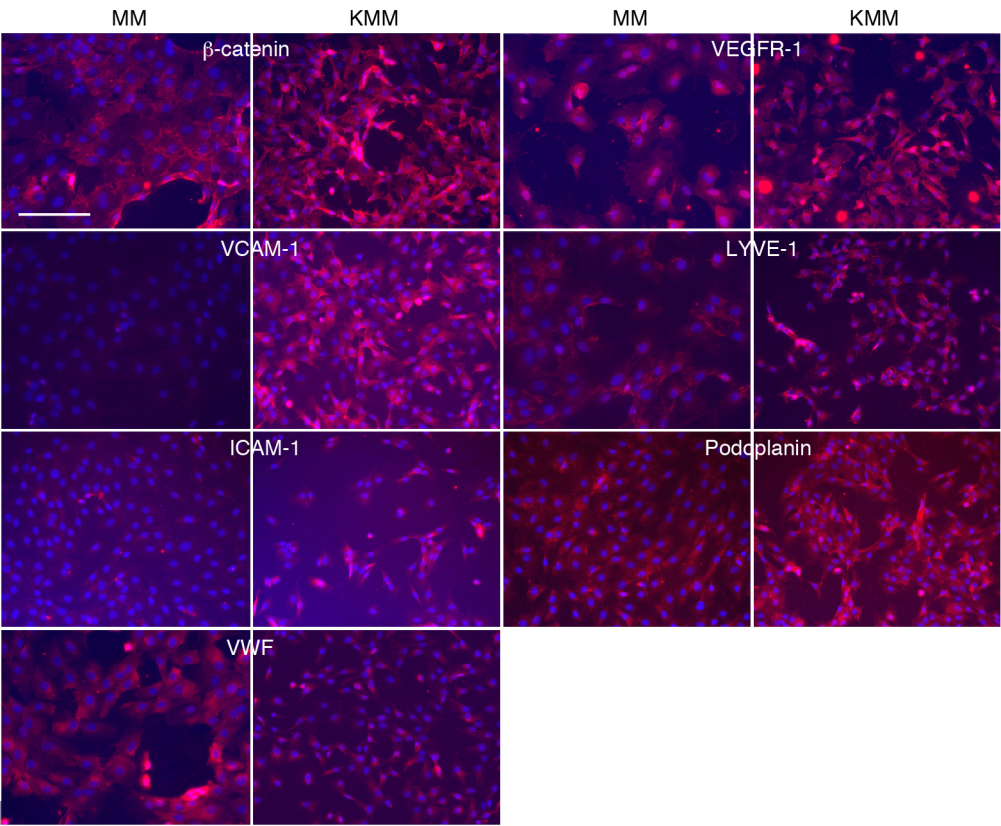



# Supplemental Figure 5

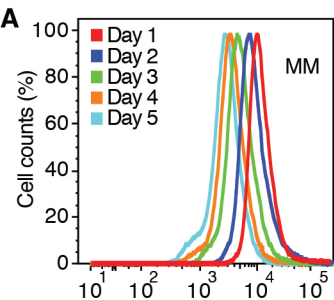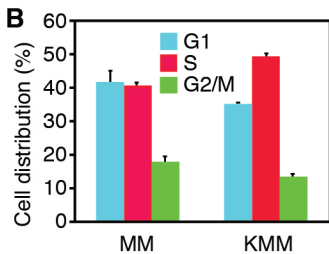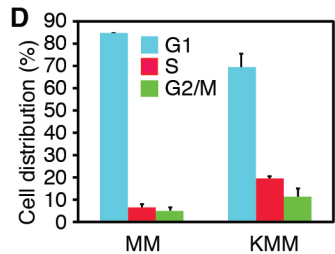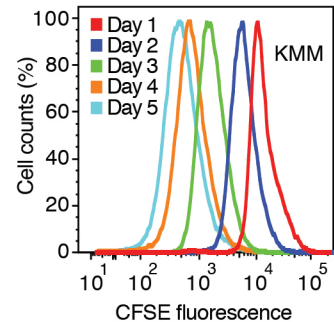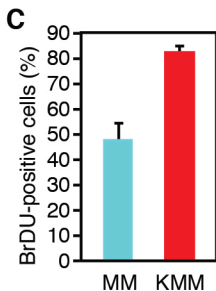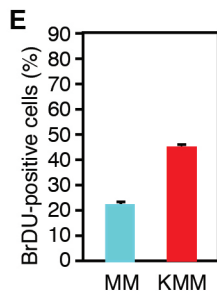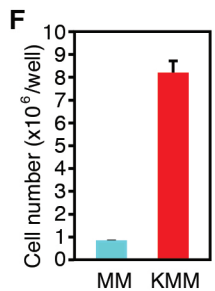

# Supplemental Figure 6

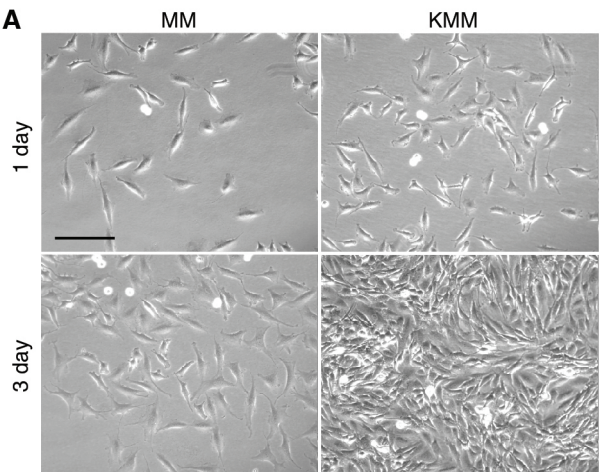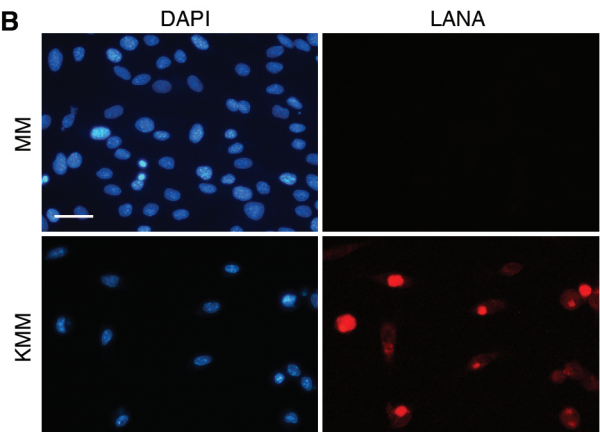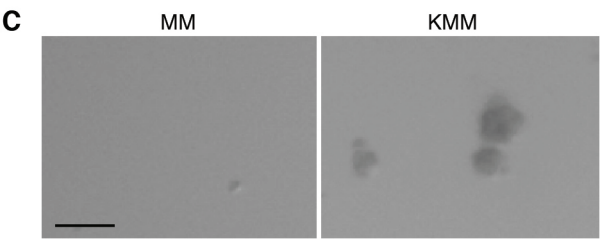

# Supplemental Figure 7

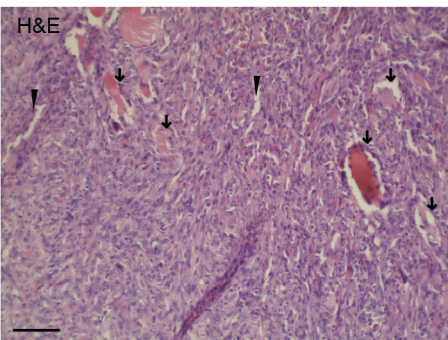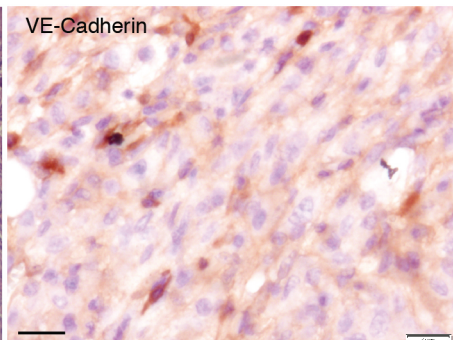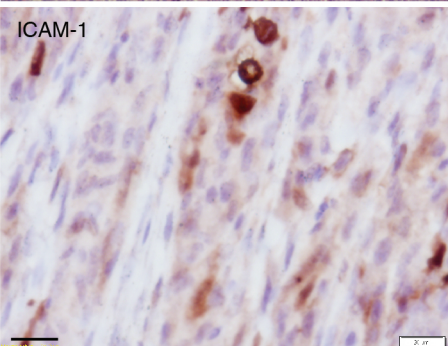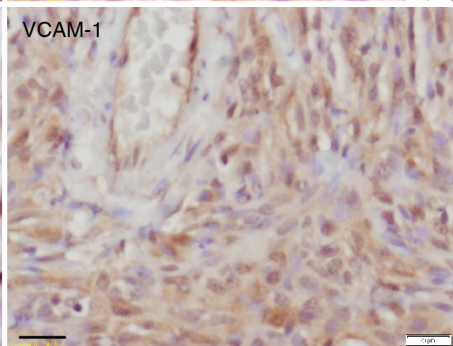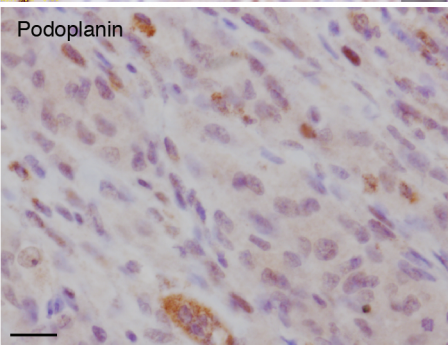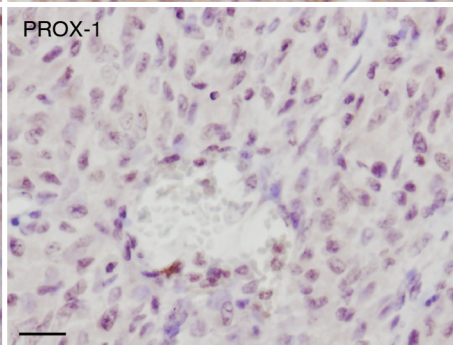

# Supplemental Figure 8

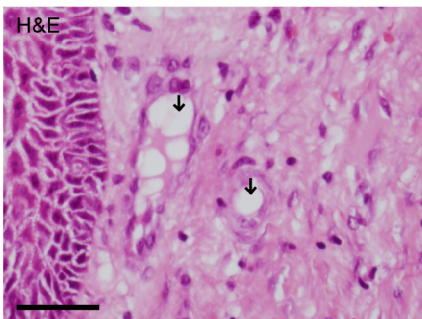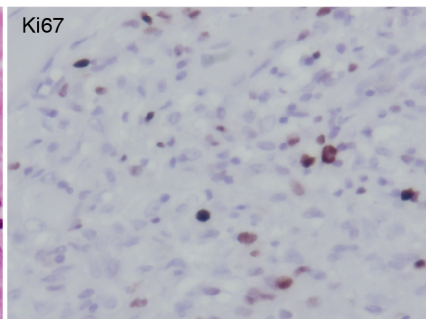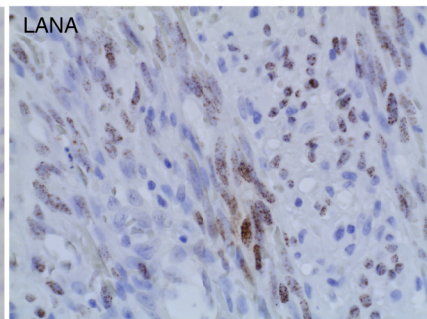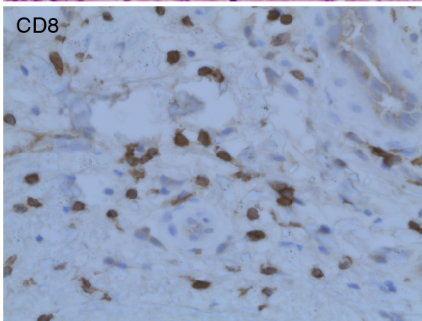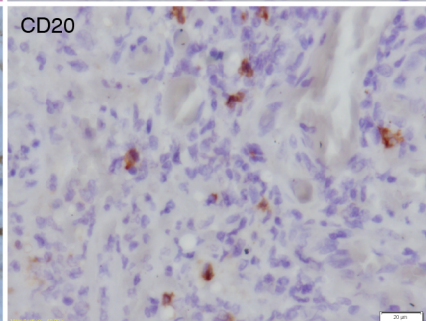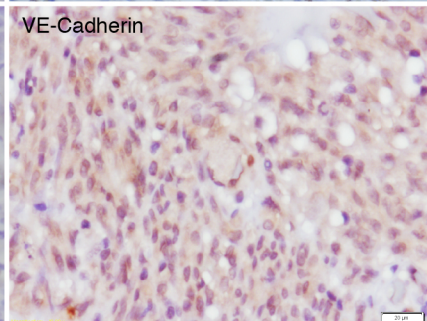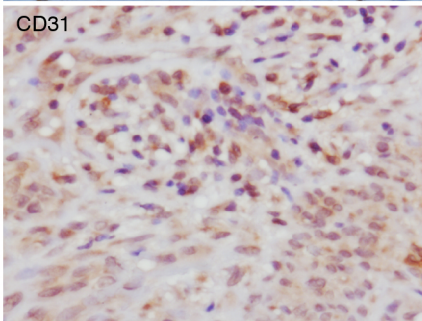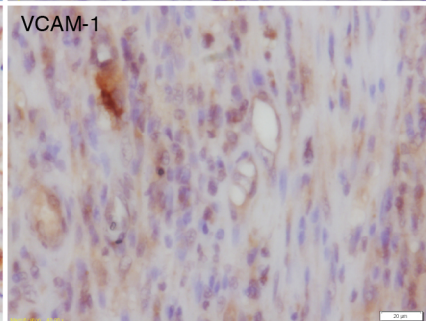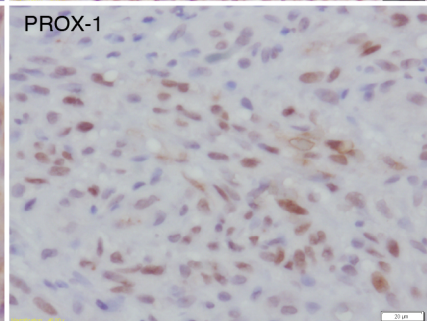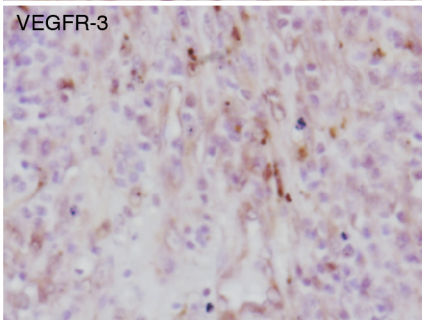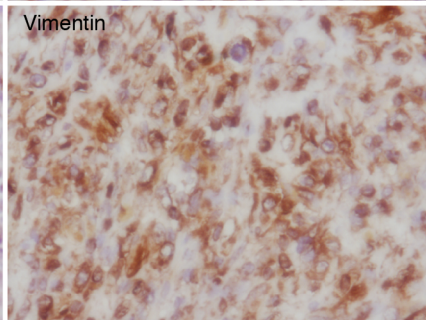

# Supplemental Figure 9

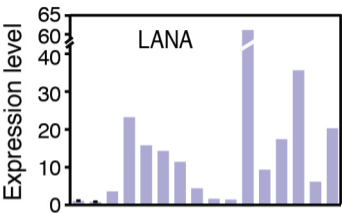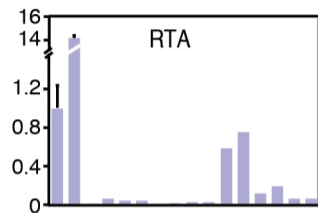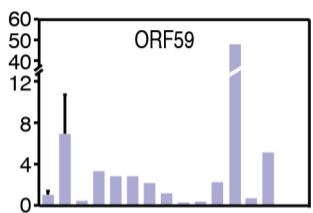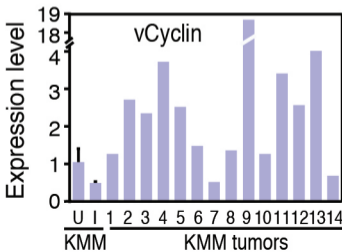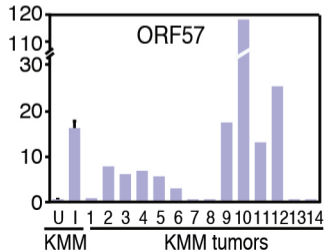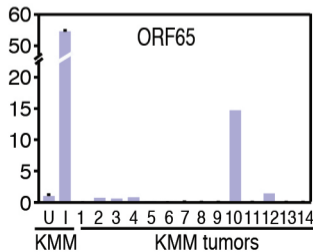

Supplement: sd1 [file 1]
